# Supplementary material for: Striking variation in chromosome structure within Musa acuminata subspecies, diploid cultivars, and F1 diploid hybrids
Source: Front Plant Sci. 2024 Jul 4;15:1387055. doi: 10.3389/fpls.2024.1387055 (PMC11255410; doi:10.3389/fpls.2024.1387055)
Supplement: Supplementary file 5 [file Table_1.xlsx]

## Sheet: Sheet1
Chromosome structures observed in Musa spp. by chromosome specific oligo painiting FISH with the probes designed for M. acuminata ‘DH Pahang’
Genotype name	aneuploid	7L/1L	7S missing	1S missing	ch2 missing	triploid	1L/3L	1L/4L	4L/1L	short region of 1L on 1S	1L/7S	7L telocentric	1L/9S	9S/1L	2L/8L	3S/8L	8S/3L	3L/4S	short region of 5L on 5S in centr.	short region of 9S on 5 in centr.	short region of 9L on 6L in centr.	7S/8S	7L/8L	7S/7L/8S	7L/7S/8L	10L/7L/7S/8L	7S/7L/1L	telocentric 1L/7S/7L
DIPLOIDS
M.acuminata/mallacensis/DH_Pahang/ITC1511 *	0	0	0	0	0	0	00	00	00	00	00	00	00	00	00	00	00	00	00	00	00	00	00	00	00	00	00	00
M.acuminata/mallacensis/Pahang/ITC0609 *	0	0	0	0	0	0	00	00	00	00	00	00	00	00	00	00	00	00	00	00	00	00	00	00	00	00	00	00
M.acuminata/mallacensis/Malaccensis/ITC1886	0	0	0	0	0	0	00	11	11	00	00	00	00	00	00	00	00	00	00	00	00	00	00	00	00	00	00	00
M.acuminata/mallacensis/Malaccensis/ITC1887	0	0	0	0	0	0	00	11	11	11	00	00	00	00	00	00	00	00	00	00	00	00	00	00	00	00	00	00
M.acuminata/banksii/Banksii/ITC0806 **	0	0	0	0	0	0	00	00	00	00	00	00	00	00	00	00	00	00	00	00	00	00	00	00	00	00	00	00
M.acuminata/banksii/Banksii/ITC0341	0	0	0	0	0	0	00	00	00	00	00	00	00	00	00	00	00	00	00	00	00	00	00	00	00	00	00	00
M.acuminata/banksii/Banksii/ITC0896	0	0	0	0	0	0	00	00	00	00	00	00	00	00	00	00	00	00	00	00	00	00	00	00	00	00	00	00
M.acuminata/banksii/Higa/ITC0428	0	0	0	0	0	0	00	00	00	00	00	00	00	00	00	00	00	00	00	11	00	00	00	00	00	00	00	00
M.acuminata/microcarpa/Borneo/ITC0253 **	0	0	0	0	0	0	00	00	00	00	00	00	00	00	00	00	00	00	00	00	00	00	00	00	00	00	00	00
M.acuminata/burmannica/Tavoy/ITC0072 **	0	0	0	0	0	0	00	00	00	00	00	00	01	01	01	01	01	00	00	00	00	01	01	00	00	00	00	00
M.acuminata/burmannicoides/Calcutta4/ITC0249 **	0	0	0	0	0	0	00	00	00	00	00	00	11	11	11	00	00	00	00	00	00	00	00	00	00	00	00	00
M.acuminata/siamea/Pa_Rayoni/ITC0672 **	0	0	0	0	0	0	00	00	00	00	00	00	11	11	11	00	00	01	00	00	00	00	00	00	00	00	00	00
M.acuminata/siamea/Khae_Phrae/ITC0660	0	0	0	0	0	0	00	00	00	00	00	00	11	11	11	00	00	00	00	00	00	00	00	11	11	01	00	00
M.acuminata/zebrina/Maia_Oa/ITC0728 **	0	0	0	0	0	0	00	00	00	00	00	00	00	00	00	11	11	00	00	00	00	00	00	00	00	00	00	00
M.acuminata/zebrina/Zebrina/ITC1139	0	0	0	0	0	0	00	00	00	00	00	00	00	00	00	00	00	00	00	00	00	00	00	00	00	00	00	00
Musa_cultivar/AA/Pisang_lilin/ITC1121 **	0	0	0	0	0	0	00	01	01	00	00	00	00	00	00	00	00	00	00	00	00	00	00	00	00	00	00	00
Musa_cultivar/AA/Mchare/Huti_white **	0	0	0	0	0	0	00	01	01	00	00	00	00	00	00	01	01	00	00	00	00	00	00	00	00	00	00	00
Musa_cultivar/AA/Mchare/Huti_ShumbaNyeelu/ITC1452 **	0	0	0	0	0	0	00	01	01	00	00	00	00	00	00	01	01	00	00	00	00	00	00	00	00	00	00	00
Musa_cultivar/AA/Mchare/Ndyali/ITC1552 **	0	0	0	0	0	0	00	01	01	00	00	00	00	00	00	01	01	00	00	00	00	00	00	00	00	00	00	00
Musa_cultivar/AA/Mchare/Mchare_mlelembo	0	0	0	0	0	0	00	01	01	00	00	00	00	00	00	01	01	00	00	00	00	00	00	00	00	00	00	00
Musa_cultivar/AA/Mchare/Kahuti	0	0	0	0	0	0	00	01	01	00	00	00	00	00	00	01	01	00	00	00	00	00	00	00	00	00	00	00
Musa_cultivar/AA/Mchare/Mcahre_laini	0	0	0	0	0	0	00	01	01	00	00	00	00	00	00	01	01	00	00	00	00	00	00	00	00	00	00	00
Musa_cultivar/AA/Unknown/Himone/ITC0886	0	0	0	0	0	0	00	00	00	00	00	00	00	00	00	01	01	00	00	00	00	00	00	00	00	00	00	00
Musa_cultivar/AA/Unknown/Maleb/ITC0809	0	0	0	0	0	0	00	00	00	00	00	00	00	00	00	11	11	00	00	00	00	00	00	00	00	00	00	00
Musa_cultivar/AA/Unknown/Marakudu/ITC1210	0	0	0	0	0	0	00	00	00	00	00	00	00	00	00	00	00	00	00	00	00	00	00	00	00	00	00	00
Musa_cultivar/AA/Unknown/VuduBeo/ITC1211	0	0	0	0	0	0	00	01	01	00	00	00	00	00	00	00	00	00	00	00	00	00	00	00	00	00	00	00
Musa_cultivar/AA/Sucrier/MaiaHapai/ITC1172	0	0	0	0	0	0	00	01	01	00	00	00	00	00	00	00	00	00	00	00	00	00	00	00	00	00	01	01
Musa_cultivar/AA/Unknown/TuuGia/ITC0610	0	0	0	0	0	0	00	00	00	00	00	00	00	00	00	00	00	00	00	00	00	00	00	00	00	00	00	00
Musa_cultivar/AA/Unknown/Rose/ITC0712	0	0	0	0	0	0	00	01	01	00	01	01	00	00	00	00	00	00	00	00	00	00	00	00	00	00	00	00
Musa_F1/Mchare_laini x Calcutta4/NM275-4	0	0	0	0	0	0	00	01	01	00	00	00	01	01	01	00	00	00	00	00	11	00	00	00	00	00	00	00
Musa_F1/Mchare_laini x Calcutta4/NM258-3	0	0	0	0	0	0	00	00	00	00	00	00	01	01	01	01	01	00	00	00	11	00	00	00	00	00	00	00
Musa_F1/Mchare_laini x Calcutta4/NM209-3	0	0	0	0	0	0	00	00	00	00	00	00	01	01	01	01	01	00	00	00	00	00	00	00	00	00	00	00
Musa_F1/Ijihu_inkudu x Calcutta4/NM237-8	0	0	0	0	0	0	00	01	01	00	00	00	00	00	00	01	01	00	11	00	00	00	00	00	00	00	00	00
Musa_F1/Huti_white x Calcutta4/T.2269-1	0	0	0	0	0	0	00	00	00	00	00	00	01	01	01	00	00	00	00	00	00	00	00	00	00	00	00	00
Musa_F1/Huti_white x Calcutta4/T.2774-6	0	0	0	0	0	0	00	00	00	00	00	00	01	01	01	01	01	00	00	00	00	00	00	00	00	00	00	00
Musa_F1/Huti_white x Calcutta4/T.2774-9	0	0	0	0	0	0	00	00	00	00	00	00	01	01	01	01	01	00	00	00	00	00	00	00	00	00	00	00
Musa_F1/Mchare_mlelembo x Calcutta4/T.2619-15							00	00	00	00	00	00	01	01	01	01	01	00	00	00	00	00	00	00	00	00	00	00
NOTES
* Šimoníková et al. (2019). Front. Plant Sci. 10, 1503.
** Šimoníková et al. (2020). Int. J. Mol. Sci. 21, 7915.
Newly analyzed; new chromosome structures are highlighted
00 / 11 = homozygous state of absence / presence of the chromosome structure in diploids
01 = heterozygous state of the chromosome structure in diploids
000 / 111 = homozygous state of absence / presence of the chromosome structure in triploids
001 / 011 = heterozygous state of the chromosome structure in triploids
