# Supplementary material for: Striking variation in chromosome structure within Musa acuminata subspecies, diploid cultivars, and F1 diploid hybrids
Source: Front Plant Sci. 2024 Jul 4;15:1387055. doi: 10.3389/fpls.2024.1387055 (PMC11255410; doi:10.3389/fpls.2024.1387055)
Supplement: Supplementary file 6 [file Table_2.xlsx]

## Sheet: Sheet1
Supplementary Table 2. Sequencing data and number of SNPs used in the study
				Number of SNPs assigned to indivudual chromosomes
Accession	Number of trimmed Illumina paired-end reads	Alelles specific to Parental group 1	Alleles specific to Parental group 2	Chr01	Chr02	Chr03	Chr04	Chr05	Chr06	Chr07	Chr08	Chr09	Chr10	Chr11
‘NM275_4’ (‘Mchare Laini’ × ‘Calcutta 4’)	149,565,794	79,962	79,593	5,246	7,407	7,098	9,306	9,178	7,669	7,309	7,042	7,112	6,923	6,744
‘NM258_3’ (‘Mchare Laini’ × ‘Calcutta 4’)	92,039,549	77,233	77,197	5,114	7,197	6,926	9,043	8,974	7,517	7,264	6,993	7,059	6,712	6,687
‘NM209_3’ (‘Mchare Laini’ × ‘Calcutta 4’)	109,558,845	79,385	78,851	5,189	7,368	6,994	9,271	9,093	7,592	7,313	7,020	7,058	6,884	6,733
‘NM237_8’ (‘Ijihu Inkudu’ × ‘Calcutta 4’)	79,106,020	12,987	95,729	5,353	7,825	9,294	11,629	10,201	10,566	7,939	9,208	8,338	8,754	7,056
‘T2269_1’ (‘Huti White’ × ‘Calcutta 4’)	105,605,958	78,952	78,557	5,125	7,285	6,914	9,207	9,039	7,530	7,284	7,018	7,003	6,703	6,718
‘T2274_6’ (‘Huti White’ × ‘Calcutta 4’)	66,834,434	72,400	72,721	4,735	6,783	6,309	8,429	8,359	6,859	6,704	6,417	6,560	6,126	6,222
‘T2274_9’ (‘Huti White’ × ‘Calcutta 4’)	74,753,168	77,751	78,187	5,069	7,218	6,840	9,109	8,961	7,368	7,214	6,940	6,994	6,681	6,669
‘T2619_15’ (‘Mchare Mlelembo’ × ‘Calcutta 4’)	79,796,065	73,834	73,437	4,793	6,739	6,472	8,651	8,365	7,166	6,848	6,603	6,520	6,342	6,255
Parental group 1
Musa acuminata ssp. burmannicoides ‘Calcutta 4’ (male)	142,056,947
Parental group 2
‘Huti White’ (female; Parental group 2)	90,073,634
‘Ijihu Inkudu’ (female; Parental group 2)	130,980,632
‘Mchare Laini’ (female, Parental group 2 )	154,266,891
‘Mchare Mlelembo’ (female; Parental group 2)	62,097,571
